# Supplementary material for: Killing with proficiency: Integrated post-translational regulation of an offensive Type VI secretion system
Source: PubMed Central journal article supplement (PMC6082577; doi:10.1371/journal.ppat.1007230), 2018-07-27
Supplement: ppat.1007230.s010.pdf [file ppat.1007230.s010.pdf]

**S1 Table. Bacterial Strains and Plasmids.**

| Name                       | Description                                                                                                                                  | Source / Reference |
|----------------------------|----------------------------------------------------------------------------------------------------------------------------------------------|--------------------|
| <i>Serratia marcescens</i> |                                                                                                                                              |                    |
| Db10                       | Wild type                                                                                                                                    | [1]                |
| SJC11                      | Db10 $\Delta tssE$ ( $\Delta$ SMDB11_2271)                                                                                                   | [2]                |
| SJC19                      | Db10 $\Delta pppA$ ( $\Delta$ SMDB11_2268)                                                                                                   | [3]                |
| SJC25                      | Db10 $\Delta ppkA$ ( $\Delta$ SMDB11_2275)                                                                                                   | [3]                |
| KK2                        | Db10 $\Delta fha$ ( $\Delta$ SMDB11_2267)                                                                                                    | [3]                |
| MJF16                      | Db10 <i>fha-HA</i> (encodes Fha-HA at normal chromosomal location)                                                                           | [3]                |
| SJC48                      | Db10 <i>fha-HA</i> , $\Delta ppkA$                                                                                                           | [3]                |
| SJC49                      | Db10 <i>fha-HA</i> , $\Delta pppA$                                                                                                           | [3]                |
| KK3                        | Db10 $\Delta tagF$ ( $\Delta$ SMDB11_2256)                                                                                                   | This study         |
| FRC01                      | Db10 $\Delta ppkA\Delta tagF$                                                                                                                | This study         |
| FRC65                      | Db10 $\Delta pppA\Delta tagF$                                                                                                                | This study         |
| FRC03                      | Db10 $\Delta fha\Delta tagF$                                                                                                                 | This study         |
| KB01                       | Db10 $\Delta rtkS$ ( $\Delta$ SMDB11_2269), (or $\Delta rtkS$ )                                                                              | This study         |
| JJW01                      | Db10 $\Delta ppkA\Delta rtkS$                                                                                                                | This study         |
| JJW02                      | Db10 $\Delta pppA\Delta rtkS$                                                                                                                | This study         |
| JJW03                      | Db10 $\Delta tagF\Delta rtkS$                                                                                                                | This study         |
| FRC63                      | Db10 <i>fha-HA</i> , $\Delta rtkS$                                                                                                           | This study         |
| GM127                      | Db10 $\Delta ppkA\Delta tagF\Delta rtkS$                                                                                                     | This study         |
| SAN207                     | Db10 <i>tssB-gfpmut2</i> (encodes TssB-GFP translational fusion at the normal chromosomal location; TssB, SMDB11_2258)                       | [4]                |
| SAN210                     | Db10 <i>tssB-gfpmut2</i> , <i>tssL-mCherry</i> (encodes TssB-GFP and TssL-mCherry translational fusions at the normal chromosomal locations) | [4]                |
| SAN164                     | Db10 <i>fha-mcherry</i> (encodes Fha-mCherry translational fusion at the normal chromosomal location)                                        | This study         |
| AO14                       | Db10 <i>tssB-gfpmut2</i> , <i>fha-mcherry</i>                                                                                                | This study         |
| AO15                       | Db10 <i>tssB-gfpmut2</i> , <i>fha-mcherry</i> , $\Delta ppkA$                                                                                | This study         |
| AO16                       | Db10 <i>tssB-gfpmut2</i> , <i>fha-mcherry</i> , $\Delta tagF$                                                                                | This study         |
| AO18                       | Db10 <i>tssB-gfpmut2</i> , <i>fha-mcherry</i> , $\Delta ppkA\Delta tagF$                                                                     | This study         |
| AO19                       | Db10 <i>tssB-gfpmut2</i> , $\Delta fha\Delta tagF$                                                                                           | This study         |
| AO21                       | Db10 <i>tssB-gfpmut2</i> , <i>fha-mcherry</i> , $\Delta pppA$                                                                                | This study         |
| AO22                       | Db10 <i>tssB-gfpmut2</i> , <i>fha-mcherry</i> , $\Delta pppA\Delta tagF$                                                                     | This study         |
| JJW06                      | Db10 <i>tssB-gfpmut2</i> , <i>fha-mcherry</i> , $\Delta rtkS$                                                                                | This study         |
| GM83                       | Db10 RtkS-His (encodes RtkS [SMDB11_2269] with a C-terminal His <sub>6</sub> tag at the native chromosomal location)                         | [5]                |
| GM124                      | Db10 PpkA-HA (encodes PpkA [SMDB11_2275] with a C-terminal HA tag at the native chromosomal location)                                        | This study         |
| GM125                      | Db10 PpkA-HA, $\Delta rtkS$                                                                                                                  | This study         |
| GM126                      | Db10 PpkA-HA, RtkS-His                                                                                                                       | This study         |
| SJC17                      | <b>Sm-resistant derivative of <i>S. marcescens</i> ATCC 274</b>                                                                              | [2]                |

*Pseudomonas fluorescens*

KT02 Sm-resistant derivative of *P. fluorescens* 55 [2]

*Escherichia coli*

MC4100 Model K-12 strain; Sm-resistant (*rpsL150*) [6]

CC118 $\lambda$ *pir* Cloning host and donor strain for pKNG101-derived allelic exchange plasmids (*\lambda**pir*) [7]

HH26 Mobilizing strain for conjugal transfer [8]

pNJ5000 MG1655  $\Delta$ *cyaA* F. Sargent

**Plasmids**

pKNG101 Suicide vector for allelic exchange (Sm<sup>R</sup> *sacBR mobRK2 oriR6K*) [9]

pSUPROM Vector for constitutive expression of cloned genes under the control of the *E. coli* *tat* promoter (Kn<sup>R</sup>) [10]

pUT18 Bacterial Two Hybrid plasmid (for fusion of protein of interest with C-terminal T18 fragment of CyaA; Ap<sup>R</sup>) [11]

pT25 Bacterial Two Hybrid plasmid (for fusion of protein of interest with N-terminal T25 fragment of CyaA; Cm<sup>R</sup>) [12]

pSC571 pKNG101-derived allelic exchange plasmid for the generation of chromosomal in-frame  $\Delta$ *SMDB11\_2269* ( $\Delta$ 2269) deletion This study

pSC904 pKNG101-derived allelic exchange plasmid for the generation of chromosomal in-frame  $\Delta$ *SMDB11\_2267* ( $\Delta$ *fha*) deletion This study

pSC906 pKNG101-derived allelic exchange plasmid for the generation of chromosomal in-frame  $\Delta$ *SMDB11\_2256* ( $\Delta$ *tagF*) deletion This study

pSC1712 pKNG101-derived allelic exchange plasmid for the generation of chromosomal in-frame  $\Delta$ *SMDB11\_2268* ( $\Delta$ *pppA*) deletion in strains carrying the *fha-mcherry* fusion This study

pSAN58 pKNG101-derived allelic exchange plasmid for the generation of chromosomal in-frame *fha-mCherry* fusion This study

pSC833 pKNG101-derived allelic exchange plasmid for the generation of chromosomal in-frame *ppkA-HA* fusion This study

pSC590 pSUPROM-derived plasmid for constitutive expression of *SMDB11\_2269* (*rtkS*) This study

pSC701 pSUPROM-derived plasmid for constitutive expression of *tagF* (*SMDB11\_2256*) This study

pSC812 pSUPROM-derived plasmid for constitutive expression of *ppkA* (*SMDB11\_2275*) [3]

pSC591 Coding sequence for *SMDB11\_2269* (amino acids 20-328) in pUT18 This study

pSC592 Coding sequence for *SMDB11\_2269* (amino acids 20-328) in pT25 This study

pSC593 Coding sequence for PpkA<sup>P</sup> (*SMDB11\_2275*; amino acids 363-482) in pUT18 This study

pSC594 Coding sequence for PpkA<sup>P</sup> (*SMDB11\_2275*; amino acids 363-482) in pT25 This study

## References:

1. Flyg C, Kenne K, Boman HG. Insect pathogenic properties of *Serratia marcescens*: phage-resistant mutants with a decreased resistance to *Cecropia* immunity and a decreased virulence to *Drosophila*. *Journal of General Microbiology*. 1980;120(1):173-81. doi: 10.1099/00221287-120-1-173. PubMed PMID: 7012273.
2. Murdoch SL, Trunk K, English G, Fritsch MJ, Pourkarimi E, Coulthurst SJ. The opportunistic pathogen *Serratia marcescens* utilizes type VI secretion to target bacterial competitors. *J Bacteriol*. 2011;193(21):6057-69. doi: 10.1128/JB.05671-11. PubMed PMID: 21890705; PubMed Central PMCID: PMC3194891.
3. Fritsch MJ, Trunk K, Diniz JA, Guo M, Trost M, Coulthurst SJ. Proteomic Identification of Novel Secreted Antibacterial Toxins of the *Serratia marcescens* Type VI Secretion System. *Mol Cell Proteomics*. 2013;12(10):2735-49. Epub 2013/07/12. doi: 10.1074/mcp.M113.030502. PubMed PMID: 23842002; PubMed Central PMCID: PMC3790287.
4. Gerc AJ, Diepold A, Trunk K, Porter M, Rickman C, Armitage JP, et al. Visualization of the *Serratia* Type VI Secretion System Reveals Unprovoked Attacks and Dynamic Assembly. *Cell Rep*. 2015;12(12):2131-42. doi: 10.1016/j.celrep.2015.08.053. PubMed PMID: 26387948; PubMed Central PMCID: PMC4594159.
5. Mariano G, Monlezun L, Coulthurst SJ. Dual Role for DsbA in Attacking and Targeted Bacterial Cells during Type VI Secretion System-Mediated Competition. *Cell Rep*. 2018;22(3):774-85. doi: 10.1016/j.celrep.2017.12.075. PubMed PMID: 29346773; PubMed Central PMCID: PMC5792426.
6. Casadaban MJ, Cohen SN. Lactose genes fused to exogenous promoters in one step using a Mu-lac bacteriophage: in vivo probe for transcriptional control sequences. *Proc Natl Acad Sci USA*. 1979;76(9):4530-3. PubMed PMID: 159458; PubMed Central PMCID: PMC411611.
7. Herrero M, de Lorenzo V, Timmis KN. Transposon vectors containing non-antibiotic resistance selection markers for cloning and stable chromosomal insertion of foreign genes in gram-negative bacteria. *J. Bacteriol*. 1990;172(11):6557-67. PubMed PMID: 2172216; PubMed Central PMCID: PMC526845.
8. Grinter NJ. A broad-host-range cloning vector transposable to various replicons. *Gene*. 1983;21(1-2):133-43. Epub 1983/01/01. PubMed PMID: 6301943.
9. Kaniga K, Delor I, Cornelis GR. A wide-host-range suicide vector for improving reverse genetics in gram-negative bacteria: inactivation of the *blaA* gene of *Yersinia enterocolitica*. *Gene*. 1991;109(1):137-41. Epub 1991/12/20. PubMed PMID: 1756974.
10. Jack RL, Buchanan G, Dubini A, Hatzixanthis K, Palmer T, Sargent F. Coordinating assembly and export of complex bacterial proteins. *EMBO J*. 2004;23(20):3962-72. PubMed PMID: 15385959
11. Karimova G, Ullmann A, Ladant D. Protein-protein interaction between *Bacillus stearothermophilus* tyrosyl-tRNA synthetase subdomains revealed by a bacterial two-hybrid system. *J Mol Microbiol Biotechnol*. 2001;3(1):73-82. Epub 2001/02/24. PubMed PMID: 11200232.
12. Karimova G, Pidoux J, Ullmann A, Ladant D. A bacterial two-hybrid system based on a reconstituted signal transduction pathway. *Proc Natl Acad Sci USA*. 1998;95(10):5752-6. Epub 1998/05/20. PubMed PMID: 9576956; PubMed Central PMCID: PMC20451.
