# Supplementary material for: Killing with proficiency: Integrated post-translational regulation of an offensive Type VI secretion system
Source: PubMed Central journal article supplement (PMC6082577; doi:10.1371/journal.ppat.1007230), 2018-07-27
Supplement: ppat.1007230.s011.pdf [file ppat.1007230.s011.pdf]

**S2 Table. Oligonucleotide primers for plasmid construction.**

| Plasmid | Sequence of relevant primers (5'-3') <sup>1</sup> | Description                                                                                                                             |
|---------|---------------------------------------------------|-----------------------------------------------------------------------------------------------------------------------------------------|
| pSC571  | TATATCTAGAGCATTCGTCAGCACATCACC                    | Forward primer to clone upstream region of SMDB11_2269 in pKNG101 ( <i>Xba</i> I)                                                       |
|         | TATAAAGCTTCCAATATTTTCATAGTGAACCTTGCTG             | Reverse primer to clone upstream region of SMDB11_2269 in pKNG101 ( <i>Hind</i> III)                                                    |
|         | TATAAAGCTTGCCACTCACTGATTATAAGGAAAGC               | Forward primer to clone downstream region of SMDB11_2269 in pKNG101 ( <i>Hind</i> III)                                                  |
|         | TATAGGGCCCGCAGTTGGCATACTGTTCG                     | Reverse primer to clone downstream region of SMDB11_2269 in pKNG101 ( <i>Apa</i> I)                                                     |
| pSC904  | TGTATCTAGAAGGTGAAAACTGGCTGAACAG                   | Forward primer to clone upstream region of SMDB11_2267 in pKNG101 ( <i>Xba</i> I)                                                       |
|         | TAATGGATCCAAATCGCATAAGGCATTCCTGC                  | Reverse primer to clone upstream region of SMDB11_2267 in pKNG101 ( <i>Bam</i> HI)                                                      |
|         | TATAGGATCCGACTCACAGACCAAACCGGAC                   | Forward primer to clone downstream region of SMDB11_2267 in pKNG101 ( <i>Bam</i> HI)                                                    |
|         | TATAGGGCCCATATGCAGCGACTGTTCC                      | Reverse primer to clone downstream region of SMDB11_2244 in pKNG101 ( <i>Apa</i> I)                                                     |
| pSC906  | TATATCTAGAAAGTGACGCCGGACGATCTG                    | Forward primer to clone upstream region of SMDB11_2256 in pKNG101 ( <i>Xba</i> I)                                                       |
|         | TAATGGATCCAGTGCTCATGGTCATGTCCTTTC                 | Reverse primer to clone upstream region of SMDB11_2256 in pKNG101 ( <i>Bam</i> HI)                                                      |
|         | TGGTGGATCCCAAATGTTTGATTAACATCGTTCGTTG             | Forward primer to clone downstream region of SMDB11_2256 in pKNG101 ( <i>Bam</i> HI)                                                    |
|         | TATAGGGCCCAATGGCGCTCAGGGTGTG                      | Reverse primer to clone downstream region of SMDB11_2256 in pKNG101 ( <i>Apa</i> I)                                                     |
| pSC1712 | TATATCTAGACCCCGACTACTTGAAGCTGTCC                  | Forward primer to clone upstream region of SMDB11_2268 in fha-mCherry background in pKNG101 ( <i>Xba</i> I)                             |
|         | TATAAAGCTTGGTGATATTCATTACGCGTCCG                  | Reverse primer to clone upstream region of SMDB11_2268 in fha-mCherry background in pKNG101 ( <i>Hind</i> III)                          |
|         | TGTGAAGCTTTTTCTGAGCCGCGACTGAG                     | Forward primer to clone downstream region of SMDB11_2268 in pKNG101 ( <i>Hind</i> III)                                                  |
|         | TATAGGGCCCTGTTGCAGCGTGAC                          | Reverse primer to clone downstream region of SMDB11_2268 in pKNG101 ( <i>Apa</i> I)                                                     |
| pSAN58  | TATATCTAGAAAGTGGCGACGCATTGG                       | Forward primer to amplify SMDB11_2267 3' end for generation of Fha-mCherry fusion construct by overlap PCR ( <i>Xba</i> I)              |
|         | CCATGGTGGCGACCGGTGCTCCTGCTCCCGCGTCCG<br>GTTTGGTC  | Reverse primer to amplify SMDB11_2267 3' end for generation of Fha-mCherry fusion construct by overlap PCR                              |
|         | GACCAAACCGGACGCGGGAGCAGGAGCACCGGTC<br>GCCACCATGG  | Forward primer to amplify <i>mCherry</i> gene from pmCherry-N1 (Clontech) for generation of Fha-mCherry fusion construct by overlap PCR |
|         | CGGTTTGGTCTGTGAGTCTTTCTTGTACAGCTCGTC<br>CATGCC    | Reverse primer to amplify <i>mCherry</i> gene for generation of Fha-mCherry fusion construct by overlap PCR                             |
|         | GGCATGGACGAGCTGTACAAGAAAGACTCACAGAC<br>CAAACCG    | Forward primer to amplify SMDB11_2267 downstream region for generation of Fha-mCherry fusion construct by overlap PCR                   |

|        |                                                                 |                                                                                                                                                         |
|--------|-----------------------------------------------------------------|---------------------------------------------------------------------------------------------------------------------------------------------------------|
|        | TATAG <u>GGCCCC</u> GCAGCGACTGTTCCAGTTC                         | Reverse primer to amplify SMDB11_2267 downstream region for generation of Fha-mCherry fusion construct by overlap PCR ( <i>Apa</i> I)                   |
| pSC833 | TATAT <u>CTAGAC</u> GCAGACCATCGATGAAATG                         | Forward primer to clone 3' end of SMDB11_2275 in pKNG101 ( <i>Xba</i> I)                                                                                |
|        | ATATA <u>AAGCTT</u> TATGCATAATCAGGAACATCATAA<br><b>GGATAAC</b>  | Reverse primer to clone 3' end of SMDB11_2275 incorporating C-terminal <b>HA tag</b> <sup>2</sup> (amplified from pSC814) in pKNG101 ( <i>Hind</i> III) |
|        | ATATA <u>AAGCTT</u> CCCGTTCTGAAACTCCGC                          | Forward primer to clone region downstream of SMDB11_2275 in pKNG101 ( <i>Hind</i> III)                                                                  |
|        | TATAG <u>GGCCCC</u> AAACTGCTTTCGTTGTAAGTGCACG                   | Reverse primer to clone region downstream of SMDB11_2275 in pKNG101 ( <i>Apa</i> I)                                                                     |
| pSC590 | TATA <u>AAGATCT</u> ATGAAATATTGGATGCCGGG                        | Forward primer to clone SMDB11_2269 in pSUPROM ( <i>Bgl</i> II)                                                                                         |
|        | TATAT <u>CTAGAG</u> CTTTCCTTATAATCAGTGAGTGGC                    | Reverse primer to clone SMDB11_2269 in pSUPROM ( <i>Xba</i> I)                                                                                          |
| pSC701 | TATAG <u>GATCC</u> ATGAGCACTGATTCAAGCGC                         | Forward primer to clone SMDB11_2256 in pSUPROM ( <i>Bam</i> HI)                                                                                         |
|        | TATAT <u>CTAGAT</u> TAAATCAAACATTTGCGGGTACTG                    | Reverse primer to clone SMDB11_2256 in pSUPROM ( <i>Xba</i> I)                                                                                          |
| pSC591 | TATAG <u>CATGCG</u> TAAAGAGGAGGTGCCATGAACTAT<br>CGCCTGGTTTACTCC | Forward primer to clone SMDB11_2269 (amino acids 20-328) in pUT18 ( <i>Sph</i> I)                                                                       |
|        | TATAT <u>CTAGAG</u> AGTGAGTGCGCGCCGTTAACC                       | Reverse primer to clone SMDB11_2269 (amino acids 20-328) in pUT18 ( <i>Xba</i> I)                                                                       |
| pSC593 | TATAG <u>CATGCG</u> TAAAGAGGAGGTGCCATGGGCGGC<br>GAGGACGATAACC   | Forward primer to clone SMDB11_2275 (amino acids 363-482) in pUT18 ( <i>Sph</i> I)                                                                      |
|        | TATAT <u>CTAGAG</u> AACCGGCGGTGGCCGGATTGAC                      | Reverse primer to clone SMDB11_2275 (amino acids 363-482) in pUT18 ( <i>Xba</i> I)                                                                      |
| pSC592 | TATA <u>AAGATCT</u> AATGAACTATCGCCTGGTTTACTCC                   | Forward primer to clone SMDB11_2269 (amino acids 20-328) in pT25 ( <i>Bgl</i> II)                                                                       |
|        | TATAG <u>GTACCT</u> CAGTGAGTGCGCCGTTAACC                        | Reverse primer to clone SMDB11_2269 (amino acids 20-328) in pT25 ( <i>Kpn</i> I)                                                                        |
| pSC594 | TATAG <u>GATCC</u> AGGCGGCGAGGACGATAACC                         | Forward primer to clone SMDB11_2275 (amino acids 363-482) in pUT25 ( <i>Bam</i> HI)                                                                     |
|        | TATAG <u>GTACCT</u> TAAACCGGCGGTGGCCGGATTGAC                    | Reverse primer to clone SMDB11_2275 (amino acids 363-482) in pUT25 ( <i>Kpn</i> I)                                                                      |

<sup>1</sup>Incorporated restriction sites for cloning into the respective vector are underlined.

<sup>2</sup>HA (haemagglutinin) tag shown in bold, immediately follows final amino acid of SMDB11\_2275 (PpkA).
